## A lumenal interrupted helix in human sperm tail microtubules

Davide Zabeo<sup>1</sup>, John M. Heumann<sup>2</sup>, Cindi L. Schwartz<sup>2</sup>, Azusa Suzuki-Shinjo<sup>3</sup>, Garry Morgan<sup>2</sup>,  
Per O. Widlund<sup>4</sup>, Johanna L. Höög<sup>1</sup>

<sup>1</sup> Department of Chemistry and Molecular Biology, University of Gothenburg, Gothenburg, Sweden

<sup>2</sup> Department of Molecular, Cellular and Developmental Biology, University of Colorado, Boulder, CO, USA

<sup>3</sup> Krefting Research Centre, University of Gothenburg, Gothenburg, Sweden

<sup>4</sup> Sahlgrenska Academy, University of Gothenburg, Gothenburg, Sweden

Corresponding author: johanna.hoog@gu.se

Keywords: spermatozoa, cryo-electron tomography, microtubules, flagella, cilia, singlet region, microtubule associated protein, human

Running title: An interrupted helix inside microtubules

18 **Abstract**

19 Eukaryotic flagella are complex cellular extensions involved in many human diseases gathered  
20 under the term ciliopathies. Currently, detailed insights on flagellar structure come from studies  
21 on protozoa. Here, cryo-electron tomography (cryo-ET) of intact human spermatozoon tails  
22 showed a variable number of microtubules in the singlet region. Inside their lumen, a novel left-  
23 handed interrupted helix which extends several micrometers at their plus ends was discovered.  
24 This structure was named Tail Axoneme Intra-Lumenal Spiral (TAILS) and binds directly to 11  
25 protofilaments on the internal microtubule wall, coaxial with the surrounding microtubule lattice.  
26 It leaves a gap over the microtubule seam, which was directly visualized in both singlet and  
27 doublet microtubules. We suggest that TAILS may stabilize microtubules, enable rapid  
28 swimming or play a role in controlling the swimming direction of spermatozoa.  
29

## 30 Introduction

31 Cilia and flagella can be found on many animal, plant and protist cells. It is an important cellular  
32 structure that can either act as an antenna (Hilgendorf et al., 2016), receiving signals from the  
33 environment, or provide cellular motility, such as in sperm tails. Malfunctions of human flagella  
34 are known as ciliopathies, and diseases of the motile cilium specifically are called primary ciliary  
35 dyskinesia (PCD). Patients with PCD present variable symptoms, such as pulmonary disease,  
36 situs invertus and infertility in both males and females (Praveen et al., 2015; Afzelius et al.,  
37 1995).

38  
39 The flagellum consists of a membrane-covered axoneme, a complex arrangement of nine doublet  
40 microtubules (dMTs) surrounding two singlet central pair microtubules (CPs), interlinked with a  
41 multitude of protein complexes (Fisch and Dupuis-Williams, 2011). The dMTs consist of one  
42 complete A-tubule, made of 13 protofilaments, and a B-tubule, with 10 protofilaments (Nicastro  
43 et al., 2011a). In a complete microtubule made of 13 protofilaments, each  $\alpha$  and  $\beta$  tubulin subunit  
44 is laterally adjacent and longitudinally offset to another subunit of its same kind. The only  
45 exception occurs at the seam, where an  $\alpha$  and a  $\beta$  tubulin subunit are laterally in contact  
46 (Mandelkow et al., 1986; Kikkawa et al., 1994; McIntosh et al., 2009). This feature is part of the  
47 common lattice of each single microtubule. It is however currently unclear where the seam is  
48 located in axonemal microtubules. The location of this seam in the A-tubule has been suggested  
49 to be both at the dMT inner junction (Song and Mandelkow, 1995) and outer junction  
50 (Maheshwari et al., 2015; Ichikawa et al., 2017). Close to the distal tip of the eukaryotic  
51 flagellum, the B-tubule of dMTs often terminates and the A-tubule continues on, forming the so  
52 called “singlet zone” (Ringo, 1967; Satir, 1968). However, the presence of this singlet zone and  
53 its extent vary greatly (Höög et al., 2014). In rodent sperm, Woolley and Nickels (1985)  
54 observed that both the A-tubule and the B-tubule transition into singlet microtubules at the  
55 flagellum tip, coining the term “duplex microtubules” (Woolley and Nickels, 1985).

56  
57 Microtubules are regulated by hundreds of microtubule-associated proteins (MAPs) and motor  
58 proteins (Nogales and Zhang, 2016; Howard and Hyman, 2007; Akhmanova and Steinmetz,  
59 2015). MAPs fall into several categories based on their functions but, with regards to  
60 localization, they are classified into three main groups: those that bind the more dynamic plus  
61 end (+TIPs), e.g. EB1, XMAP215 and Clip170 (Perez et al., 1999; Mimori-Kiyosue et al., 2000;  
62 Nakaseko et al., 2001), those that bind and often stabilize the minus end, e.g. gamma tubulin and  
63 patronin (Goodwin and Vale, 2010; Kollman et al., 2010; Oakley and Oakley, 1989), and those  
64 that more generally interact with the microtubule outer surface, e.g. PRC1 (Chan et al., 1999;  
65 Kellogg et al., 2016). Motor proteins can also be found at all three locations, depending on the  
66 polarity of their movement (Scheffler et al., 2015). Altogether, in any given cell, the microtubule  
67 outer surfaces, plus and minus ends are often occupied by a wide assortment of MAPs and motor  
68 proteins that affect their characteristics, likely exerting effects in synergistic ways (Teng et al.,  
69 2001; Zanic et al., 2013).

70  
71 Only two known MAPs, tau and tubulin acetylase, have been suggested to localize in the  
72 microtubule interior (Kar et al., 2003; Soppina et al., 2012). Yet, electron microscopy and (cryo)  
73 electron tomography have shown that proteins also localize to the inside of microtubules  
74 (Nicastro, 2006; Schwartz et al., 2012; Dentler, 1980; Rodríguez Echandía et al., 1968; Vaughan  
75 et al., 2006; Höög et al., 2007; Garvalov et al., 2006; Sui and Downing, 2006; Brown et al.,

76 2016). These microtubule inner proteins (MIPs) are often found in dMTs and are all of unknown  
77 protein identity and function. However, their specific localization and variable frequency  
78 suggests that they serve important regulatory functions for the microtubule cytoskeleton  
79 (Nicastro et al., 2011b).

80  
81 In this study, we performed the first three-dimensional reconstruction of intact human flagella  
82 using cryo-electron tomography on spermatozoon tails. By visualizing this cell type, we  
83 discovered a novel protein complex, Tail Axoneme Intra-Luminal Spiral (TAILS), spanning  
84 several micrometers in the lumens of all healthy human spermatozoa axonemal microtubules at  
85 the distal end. TAILS binds to the inside of the microtubule and leaves a gap over the seam in  
86 single microtubules. The sub-tomogram average achieved sufficient resolution to resolve the  
87 tubulin subunits and the microtubule seam was directly visualized.

## 88 89 **Materials and methods**

### 90 **Sample collection and plunge freezing**

91 Spermatozoa were donated by three healthy men and frozen unperturbed in seminal fluid to  
92 which colloidal gold was added (to be used as fiducial markers). A Vitrobot climate-controlled  
93 plunge freezer (FEI Company Ltd., Eindhoven, The Netherlands) was used within 1-3 h post  
94 ejaculation. After freezing for electron microscopy, remaining cells were examined under the  
95 light microscope, where their motility ensured that viable spermatozoa had been frozen.

96

### 97 **Cryo-electron microscopy and tomography**

98 Microscopy was performed as described previously (Höög et al., 2012; Höög and Lötval, 2015).  
99 In brief, images (electron dose of  $\sim 25 \text{ e}^-/\text{\AA}^2$ ;  $-4$  to  $-6 \mu\text{m}$  defocus) were acquired at 27500x on a  
100 Tecnai F30 electron microscope (FEI Company Ltd) operated at 300 kV. The detector was a  
101 GATAN UltraCam, lens-coupled, 4 K CCD camera (binned by 2) attached to a Tridiem Gatan  
102 Image Filter (GIF: operated at zero-loss mode with an energy window of 20 eV; Gatan Inc.,  
103 Pleasanton, CA, USA). For tomography, tilt-series were acquired every 1.5 degree ( $\pm 60$  degrees)  
104 using serialEM software (Mastronarde, 2005). The total electron dose was kept between 80-120  
105  $\text{e}^-/\text{\AA}^2$ . Cryo-ETs were calculated using eTomo and CTF correction was applied to all datasets.

106

### 107 **Subvolume Alignment and Averaging**

108 Models with open contours approximating the path of microtubules in the electron tomograms  
109 were created in IMOD (Kremer et al., 1996). PEET (Nicastro, 2006) was used for adding model  
110 points with the desired spacing (8 nm, matching the periodicity of the TAILS complex) along  
111 each contour and for subsequent alignments and averages. For each model point a subvolume of  
112  $60 \text{ voxel}^3$  ( $46.2 \text{ nm}^3$ ) was selected. Number of tomograms, microtubules and particles for each  
113 average can be found in table 1. Subvolumes from individual microtubules were first aligned and  
114 averaged separately. Final alignment and averaging combining microtubules and tomograms was  
115 then performed starting from positions and orientations obtained by aligning the individual tube  
116 averages. Soft-edge cylindrical masks with empirically chosen radii were applied during  
117 alignment of singlet microtubules. Wedge-mask compensated principal component analysis  
118 followed by k-means clustering (Heumann et al., 2011) was used to check for heterogeneity and  
119 to assess the impact of missing wedge artifacts on candidate alignments.

## 120 Statistical Analysis of the Singlet Region

121 Volumetric and isosurface representations corresponding to each tomogram were constructed by  
122 pasting the final average and its 3D model back into the original volumes. Statistical analysis of  
123 microtubule azimuthal positions was conducted in MATLAB (The Mathworks Inc., Natick, MA)  
124 using bootstrap analysis with 10,000 replicates and, when necessary, bounded depth-first search  
125 to compute the optimal value of the statistic of interest for each bootstrap replicate. Local  
126 measures such as mean and minimum neighbor angular distance or the number of neighbors  
127 closer than a specified angular distance showed little or no evidence of organization, with p-  
128 values ranging from 0.2 to 0.5. However, a more global measure shows strong evidence for  
129 higher-order organization. Specifically, we used bounded depth-first search to compute, for each  
130 spermatozoon, the length of the minimum angular distance path visiting each singlet microtubule  
131 exactly once. An overall probability of finding non-random orientation of microtubules based on  
132 data from all three spermatozoa was calculated. Combining the p-values for each spermatozoon  
133 using Fisher's method for independent hypothesis tests (Fischer, 1925; Frederick and Fischer,  
134 1948) showed that microtubules are non-randomly organized (overall p-value = 0.005).  
135 Alternatively, we can also arrive at an overall p-value by bootstrapping the mean or,  
136 equivalently, the sum of the 3 minimum path lengths. Doing so resulted in only 24 successes out  
137 of 10,000 trails, corresponding to an even lower p-value estimate of 0.002. Both estimates are  
138 well below the conventional threshold of 0.05.

139

## 140 Results

### 141 Observation of an interrupted helix in the singlet microtubule lumen

142 To study the structure of human flagella, we performed cryo-electron microscopy of the distal tip  
143 of human spermatozoa that were plunge frozen in complete seminal fluid and we generated 55  
144 cryo-electron tomograms on a total of 33 intact human sperm tails (Table 1). The exact location  
145 along the sperm tails and area included in 22 of those tomograms could be identified using lower  
146 magnification images (Figure 1A).

147 The end piece of spermatozoa contained only singlet microtubules (Figure 1B-C). 23 cryo-  
148 electron micrographs of different human spermatozoa end pieces displayed an unexpected,  
149 extensive, and regular interior structure in all microtubules (Supplementary Figure 1). This  
150 structure was further analyzed and studied in the acquired tomograms (Figure 1B, D). Transverse  
151 lumenal slices of the electron tomograms offset from the center displayed diagonal electron  
152 densities with 8 nm periodicity. The tilt of the striations was reversed on opposing sides of the  
153 lumen (arrows in Figure 1B and Supplementary movie 1), suggesting a left-handed helix with a  
154 pitch of 8 nm. We named this structure Tail Axoneme Intra-Lumenal Spiral (TAILS).

155

156 To investigate the extent of the TAILS complex, cryo-electron tomograms further from the tip  
157 were examined. A transition from distal singlet microtubules into doublet microtubules was  
158 observed in one tomogram, approximately 2.5  $\mu\text{m}$  away from the tip (Figure 1E-F). In this  
159 region, the TAILS structure was still continuous inside all the singlet microtubules and persisted  
160 into the doublet microtubules. TAILS eventually terminated approximately 300 nm into the dMT  
161 (Figure 1G). It thus extended for around 3  $\mu\text{m}$  from the spermatozoon tip. A TAILS-like  
162 structure was also present in the lumen of the B tubules, starting from their plus end, and it  
163 extended, with its 8 nm periodicity, further towards the sperm head than TAILS in the A-tubule.  
164 Closer to the cell body, the A-tubule was filled with less defined electron density.

165  
166 Intraluminal TAILS-like striations were also found inside central pair microtubules. The distance  
167 from the tip at which central pair microtubules terminated was variable between cells. The  
168 central pair microtubules stretched through one tomogram acquired at 5.5  $\mu\text{m}$  from the sperm tip  
169 (Figure 1H). In another cryo-ET, acquired closer to the cell body, the central pair microtubules  
170 terminated at 7.5  $\mu\text{m}$  from the tail tip. This indicates that central pair microtubules might extend  
171 less far than other axonemal microtubules. In both cryo-ETs the TAILS-like striations were  
172 found in the central pair microtubules (Supplementary Figure 2). In neither of these tomograms  
173 did the dMTs terminate nor contain TAILS, probably because this occurs closer to the tip, as  
174 described above. These results suggest a preference for TAILS to localize towards the  
175 microtubule plus ends.

176

177 **The TAILS complex binds to 11 protofilaments with a gap over the seam**

178 At first sight, it is difficult to see how one might reconcile an 8 nm pitch interior helix with the  
179 12 nm pitch expected at the seam of the 13-protofilaments wall of singlet microtubules (Figure  
180 2A). To resolve this discrepancy and clarify the nature of the structure, we performed sub-  
181 volume alignment and averaging on 1940 particles that were selected along 34 singlet  
182 microtubules.

183

184 Sub-volume averaging increased the signal-to-noise ratio revealing a left-handed interrupted  
185 helix. In longitudinal view, TAILS was clearly recognizable as the repetitive pattern seen in the  
186 raw data (Figure 2B-C; Supplemental Movie 2). A 3D model of the sub-tomogram average was  
187 created using density thresholding, which also showed the structure of TAILS (Figure 2D;  
188 Supplemental Movie 2). The average showed that TAILS is made up of multiple helical  
189 segments. One TAILS segment occurs every 8 nm along the microtubule axis. Each segment has  
190 a pitch of 12 nm, matching that of 13 the protofilament microtubule wall (Figure 2A). This led us  
191 to examine the site of TAILS binding in relation to the microtubule seam. The seam could be  
192 directly identified in the microtubule lattice (Figure 2E-F; Supplementary Figure 3).

193

194 In cross-sectional view the TAILS complex is clearly visible as an electron density (Figure 2G)  
195 which rotates around the lumen when viewed at successive positions along the microtubule axis  
196 (Supplemental movie 3). Moving through the sub-tomogram average, gaps in the TAILS  
197 complexes are apparent on the inside of the microtubule (Figure 2H-I). Each segment spans  
198 between 240 and 305 degrees (based on centers or edges of electron densities, respectively)  
199 leaving a gap spanning portions of 2 protofilaments around the MT seam. The proximal end of a  
200 given segment occurs at approximately the same axial height as the distal end of the previous  
201 segment. The result is a stack of identically oriented, C-shaped segments that are coaxial with the  
202 surrounding tubulin helix. TAILS can also be thought of as an interrupted or incomplete 3 start  
203 helix, where the interruption is found across the microtubule seam.

204

205 **Microtubules in the human singlet zone are non-randomly organized**

206 The singlet zone appears less highly organized than the more cell body proximal complete  
207 axoneme. In the human spermatozoa investigated here, the number and position of microtubules  
208 are variable both within the singlet zone of an individual single sperm tail, and between singlet  
209 zones of different sperm tails. The disruption of TAILS decoration over the MT seam can be



210 used as a compass to investigate whether or not microtubule seams in the singlet region are  
211 randomly oriented with respect to each other.

212  
213 Three cryo-ETs of singlet regions containing 9, 11 and 14 microtubules were investigated, two  
214 were acquired at the absolute tip of the sperm tail and one at 1.5  $\mu\text{m}$  from the tip (Figure 3A).  
215 The presence of 14 singlet microtubules in one cryo-ET is noteworthy since it shows that both A-  
216 and B- tubules nucleate singlet microtubules. All of these microtubules consisted of 13  
217 protofilaments, meaning that the incomplete B-tubule gained 3 protofilaments after separating  
218 from the A-tubule. Using the coordinates applied to rotate particles and generate the sub-  
219 tomogram average, the 3D isosurface models of singlet microtubules could be docked back into  
220 a 3D model representing the microtubule orientation inside each cell, allowing easy visualization  
221 of the seam orientations (Figure 3B-D).

222  
223 To investigate possible non-randomness of singlet region seam orientations, bootstrap analysis  
224 was performed using a number of local and global measures of orientation. Local measures, such  
225 as mean or minimum angular distance to neighboring tubules, showed no indication of non-  
226 randomness. A more global measure, total change in angle for a path visiting each microtubule  
227 exactly once, does however suggest partial ordering. Bootstrapped p-value estimates of 0.011,  
228 0.301, and 0.031 were obtained for singlet zones with 9, 11, and 14 microtubules, respectively.  
229 Combined data from all 3 singlet zones yields a highly significant p-value  $\leq 0.005$ , as described  
230 in Materials and Methods, indicating that seam orientations are not completely random. We  
231 suggest that the observed deviations from randomness likely reflect remnants of the more rigid  
232 organization of the proximal axoneme.

233  
234 The seam is located between protofilaments A8 and A9 of the doublet microtubules  
235 Since the position of the A-tubule seam in dMTs has not been resolved using cryo-ET, and other  
236 methods such as single particle analysis have given conflicting results (Song and Mandelkow,  
237 1995; Ichikawa et al., 2017; Maheshwari et al., 2015), there is still some debate as to where it is  
238 localized. The orientation of the gap in TAILS can be used as an indicator of the microtubule  
239 seam position in dMTs.

240  
241 In two cryo-ETs that we acquired, the transition from dMTs to singlets was included in the  
242 volume. The TAILS complex clearly extended into dMTs in one of these tomograms (Figure  
243 1G). In the other cryo-ET, the TAILS complex in the A-tubule was not visible but B-tubules still  
244 had clear luminal decorations. This shows that the extent of the TAILS complex within dMTs is  
245 variable. Only the tomogram with complete TAILS decoration in both dMTs (478 particles) was  
246 used for sub-tomogram averaging. The structure has an 8 nm repeat, like in singlet microtubules,  
247 and a gap of the TAILS complex was found to be at the outer junction between protofilament A8  
248 and A9 of the dMTs (Figure 4A-F; Movie S4). Thus, we inferred that this is the position of the  
249 A-tubule seam. Inside the B-tubule seven or eight protofilaments were decorated, possibly with a  
250 TAILS-like protein but protofilament B1, B10 and possibly B9 were undecorated.

251  
252 Sub-tomogram averaging enabled to increase the signal to noise ratio to the point where the  $\alpha$   
253 and  $\beta$  tubulins are resolved in our dMTs (Figure 4G). The seam is clearly visible between  
254 protofilament A8 and A9 (Figure 4G-I), in the outer junction of the dMT. In comparison, the  
255 dMT inner junction shows a perfect B-lattice (Figure 4J).

256 Tubulin heterodimers are equally spaced 8 nm apart, but there appears to be a compaction of  
257 their electron densities that may or may not be TAILS related.  
258

## 259 Discussion

260 This is the first time an intact human flagellum has been studied using cryo-electron tomography.  
261 We have described a novel structure that we named TAILS, which is comprised of helical  
262 segments spaced every 8 nm. Many TAILS segments assemble into an array along several  
263 micrometers of the inner wall of all singlet microtubules in the end piece of human sperm tails.  
264 TAILS binds to the inside of the tubulin heterodimers and spans 11 protofilaments. The  
265 interruption of the helix spans over the position of the microtubule seam. TAILS has a pitch and  
266 handedness matching that of the tubulin helices comprising the microtubule wall. This pattern is  
267 consistent with what would be expected for a structure comprised of repeating identical segments  
268 or subunits capable of distinguishing between  $\alpha$  and  $\beta$  tubulin. We suggest two alternative  
269 models for the molecular structure of TAILS, which could consist of multiple monomeric  
270 segments (Figure 5A) or multiple groups of 11 subunits (Figure 5B), leaving a gap over the seam  
271 in either case. Our sub-tomogram averaging yielded a resolution that was high enough to  
272 distinguish some of the tubulin subunits on the dMTs still inside of the frozen cell in its native  
273 state. The gaps between heterodimers have previously been shown to be larger than those  
274 between the subunits of each dimer (Alushin et al., 2014), therefore we consider it most likely  
275 that this gap in the microtubule lattice occurs in between heterodimers. We infer the identity of  
276 the tubulin subunits with the help following information: 1) microtubule plus end is capped with  
277 the  $\beta$ -tubulin subunit (Mitchison, 1993), and 2) flagella have their microtubule plus ends at the  
278 flagellum tip (Euteneuer and McIntosh, 1981; Song and Mandelkow, 1995). TAILS binds in the  
279 interface between the  $\alpha$  and  $\beta$  tubulin subunits, and extends with a slight slope towards the  
280 microtubule plus end (Figure 4G and K-L).

281  
282 The achieved resolution allowed identification of the seam in both singlets and dMTs, making  
283 this the first time this structure has been visualized directly inside a cell. The reported position of  
284 the seam in dMTs differs with previously published papers. First, the seam was inferred to be at  
285 the inner junction of the dMTs of sea urchin sperm (*Psammechinus miliaris*) (Song and  
286 Mandelkow, 1995), then two more recent papers, using single particle techniques to achieve high  
287 resolution maps of dMTs from *Tetrahymena thermophila*, suggested a position of the seam at the  
288 outer junction, between protofilaments A9-10 (Ichikawa et al., 2017) or A10-11 (Maheshwari et  
289 al., 2015). We find the seam between the A8-9 protofilaments, both by the location of the gap in  
290 TAILS and by direct visualization. The differences observed might be a result of using different  
291 methods, or it might reflect a real difference in the location of the seam between species.

292  
293 The presence of 14 microtubules in the singlet region shows that also in humans, the dMTs can  
294 split and form a duplex microtubule, like the ones seen in rodent spermatozoa (Woolley and  
295 Nickels, 1985). The 13 protofilament microtubule lattice found *in vivo* has been shown to be  
296 determined by the nucleation factor  $\gamma$  tubulin ring complex ( $\gamma$ -TuRC) (Moritz et al., 1995). That  
297 all the singlet microtubules consist of 13 protofilaments, even those derived from the 10  
298 protofilaments B-tubule, argues that  $\gamma$ -TuRC is not the sole determinant of protofilament number  
299 *in vivo*. The orientation preference of the microtubules in the singlet zone suggests that the  
300 singlets maintain the seam position previously established in the complete axoneme.  
301



302 TAILS decorates the inside of every tubulin heterodimer, except the two protofilaments at the  
303 seam, for several micrometers before the microtubule plus ends. The function of this complex  
304 structure is of course of highest interest. We suggest four different hypotheses, which are not  
305 mutually exclusive. First, TAILS seems to have compacted the tubulin heterodimer, a feature  
306 which would translocate to the outside of the microtubule. This rearrangement of the lattice  
307 might prevent motor proteins and other MAPs to bind in their regular way, defining the singlet  
308 region in a molecular manner. Second, TAILS might provide extra rigidity to the microtubules in  
309 this region, so that the end piece has an increased stiffness, which might aid motility, crucial to  
310 spermatozoa. It may provide a structural support such as the para-flagellar rod in *Trypanosoma*  
311 *brucei* (Höög et al., 2012; Portman and Gull, 2010; Koyfman et al., 2011), another single cell  
312 whose motility is crucial for its survival (Broadhead et al., 2006). Third, the TAILS complex  
313 could also stabilize microtubules, preventing the dynamic turnover constantly occurring in  
314 flagella tips (Marshall, 2001). Helical reinforcement is a low weight solution regularly used in  
315 engineering, *e.g.* in bicycle frame tubes or in armored hoses. Since microtubules depolymerize  
316 by outward curling of protofilaments (Simon and Salmon, 1990; Mandelkow et al., 1991),  
317 TAILS could prevent splaying similar to how spiral hose reinforcement prevents radial  
318 expansion. The saved energy could then instead be invested in rapid translocation. This  
319 hypothesis is consistent with the observation that the TAILS complexes extend to the central pair  
320 microtubules, far into the sperm tail. Lastly, TAILS might also play a role in determining the  
321 direction in which spermatozoa swim, since there is evidence in other organisms that the singlet  
322 zone may be associated with signaling or sensory functions as well as motility (Fisch and  
323 Dupuis-Williams, 2011).

324  
325 Potential mechanisms for controlling the extent and orientation of the helical segments are worth  
326 considering. The TAILS complex has a gap in the structure spanning the inside of the  
327 microtubule seam. Binding specificity of the putative inner wall binding monomers coupled with  
328 conformational variation of the subunits closest to the seam alone could account for the observed  
329 structure. A monomer binding to the alpha and beta tubulin interface, like TAILS, could be  
330 unable to bind to the intraheterodimer interface across the seam, leaving a gap. If a bridge over  
331 this gap is present, such a structure would likely be comprised of protein(s) distinct from the  
332 inner wall binding monomers, and its length might naturally limit the span of the helical  
333 segments.

334 We performed cryo-electron microscopy and tomography on intact human spermatozoa. This  
335 study led to the finding of a novel, complex structure inside of the microtubule lumen, even  
336 though microtubules have been studied for over 50 years. This underlines the importance of  
337 studying human microtubules and flagella, as well as other organisms, by cryo-ET. Since sperm  
338 motility and morphology are determinants of male fertility (Esteves, 2016), understanding the  
339 functional role of the TAILS complex may have clinical implications relating to male infertility  
340 and contraception. We look forward to the future identification of the proteins involved in  
341 regulating the microtubule cytoskeleton from the luminal side, including the proteins forming  
342 the TAILS complex.

343

### 344 Acknowledgements

345 We thank R. Neutze for helpful discussions and for contributing funding from the Göran  
346 Gustafsson Foundation for Research in Natural Sciences and Medicine (awarded in Stockholm  
347 May 2016) and Wallenberg grant KAW2014.0275 and KAW2012.0106. We thank Dr. J. Van

348 Blerkom at Colorado Reproductive Endocrinology for providing samples for our study, and J. R.  
349 McIntosh and A. Hoenger for helpful discussions. JHL was supported by a Sir Henry Wellcome  
350 Postdoctoral grant and a VR young investigator grant. Electron microscopy was done at Boulder  
351 EM Services Core Facility in MCDB, the University of Colorado.  
352

### 353 **Author contribution**

354 Experimental design: JLH, POW. Acquisition of cryo-electron micrographs: JLH, GM.  
355 Acquisition of cryo-electron tomograms: JLH, CLS. Calculation and modelling of tomograms:  
356 JLH, DZ. Sub-tomogram averaging and processing of data: JMH, DZ and ASS. Writing of  
357 manuscript: JMH, POW, DZ and JLH.  
358

### 359 **Competing interests**

360 Authors declare no competing interests.  
361  
362

363 **References**

- 364
- 365 Afzelius, B.A., R. Dallai, S. Lanzavecchia, and P.L. Bellon. 1995. Flagellar structure in normal  
366 human spermatozoa and in spermatozoa that lack dynein arms. *Tissue Cell*. 27:241–247.
- 367 Akhmanova, A., and M.O. Steinmetz. 2015. Control of microtubule organization and dynamics:  
368 two ends in the limelight. *Nat Rev Mol Cell Biol*. 16:711–726. doi:10.1038/nrm4084.
- 369 Alushin, G.M., G.C. Lander, E.H. Kellogg, R. Zhang, D. Baker, and E. Nogales. 2014. High-  
370 Resolution Microtubule Structures Reveal the Structural Transitions in  $\alpha$ -Tubulin upon GTP  
371 Hydrolysis. *Cell*. 157:1117–1129. doi:10.1016/j.cell.2014.03.053.
- 372 Broadhead, R., H.R. Dawe, H. Farr, S. Griffiths, S.R. Hart, N. Portman, M.K. Shaw, M.L.  
373 Ginger, S.J. Gaskell, P.G. McKean, and K. Gull. 2006. Flagellar motility is required for the  
374 viability of the bloodstream trypanosome. *Nature*. 440:224–227. doi:10.1038/nature04541.
- 375 Brown, J.R., C.L. Schwartz, J.M. Heumann, S.C. Dawson, and A. Hoenger. 2016. Journal of  
376 Structural Biology. *J. Struct. Biol*. 194:38–48. doi:10.1016/j.jsb.2016.01.011.
- 377 Chan, J., C.G. Jensen, L.C. Jensen, M. Bush, and C.W. Lloyd. 1999. The 65-kDa carrot  
378 microtubule-associated protein forms regularly arranged filamentous cross-bridges between  
379 microtubules. *Proc. Natl. Acad. Sci. U.S.A.* 96:14931–14936.
- 380 Dentler, W.L. 1980. Structures linking the tips of ciliary and flagellar microtubules to the  
381 membrane. *J. Cell. Sci.* 42:207–220.
- 382 Esteves, S.C. 2016. Novel concepts in male factor infertility: clinical and laboratory  
383 perspectives. *Journal of Assisted Reproduction and Genetics*. 1–17. doi:10.1007/s10815-  
384 016-0763-8.
- 385 Euteneuer, U., and J.R. McIntosh. 1981. Polarity of some motility-related microtubules. *Proc.*  
386 *Natl. Acad. Sci. U.S.A.* 78:372–376.
- 387 Fisch, C., and P. Dupuis-Williams. 2011. Ultrastructure of cilia and flagella - back to the future!  
388 *Biology of the Cell*. 103:249–270. doi:10.1042/BC20100139.
- 389 Fischer, R.A. 1925. Statistical methods for Research Workers. Oliver and Boyd, Edinburgh.
- 390 Frederick, M., and R.A. Fischer. 1948. Questions and answers. *The American Statistician*. 2:30–  
391 31. doi:10.2307/2681650.
- 392 Garvalov, B.K., B. Zuber, C. Bouchet-Marquis, M. Kudryashev, M. Gruska, M. Beck, A. Leis,  
393 F. Frischknecht, F. Bradke, W. Baumeister, J. Dubochet, and M. Cyrklaff. 2006. Luminal  
394 particles within cellular microtubules. *J. Cell Biol*. 174:759–765.  
395 doi:10.1073/pnas.0509527102.
- 396 Goodwin, S.S., and R.D. Vale. 2010. Patronin Regulates the Microtubule Network by Protecting  
397 Microtubule Minus Ends. *Cell*. 143:263–274. doi:10.1016/j.cell.2010.09.022.

- 398 Heumann, J.M., A. Hoenger, and D.N. Mastronarde. 2011. Journal of Structural Biology. *J.*  
399 *Struct. Biol.* 175:288–299. doi:10.1016/j.jsb.2011.05.011.
- 400 Hilgendorf, K.I., C.T. Johnson, and P.K. Jackson. 2016. ScienceDirectThe primary cilium as a  
401 cellular receiver: organizing ciliary GPCR signaling. *Current Opinion in Cell Biology.*  
402 39:84–92. doi:10.1016/j.ceb.2016.02.008.
- 403 Howard, J., and A.A. Hyman. 2007. Microtubule polymerases and depolymerases. *Current*  
404 *Opinion in Cell Biology.* 19:31–35. doi:10.1016/j.ceb.2006.12.009.
- 405 Höög, J.L., and J. Lötvall. 2015. Diversity of extracellular vesicles in human ejaculates revealed  
406 by cryo-electron microscopy. *Journal of Extracellular Vesicles.* 4. doi:10.1111/j.1439-  
407 0272.1978.tb03030.x.
- 408 Höög, J.L., C. Bouchet-Marquis, J.R. McIntosh, A. Hoenger, and K. Gull. 2012. Cryo-electron  
409 tomography and 3-D analysis of the intact flagellum in *Trypanosoma brucei*. *J. Struct. Biol.*  
410 178:189–198. doi:10.1016/j.jsb.2012.01.009.
- 411 Höög, J.L., C. Schwartz, A.T. Noon, E.T. O'Toole, D.N. Mastronarde, J.R. McIntosh, and C.  
412 Antony. 2007. Organization of interphase microtubules in fission yeast analyzed by electron  
413 tomography. *Dev. Cell.* 12:349–361. doi:10.1016/j.devcel.2007.01.020.
- 414 Höög, J.L., S. Lacomble, E.T. O'Toole, A. Hoenger, J.R. McIntosh, and K. Gull. 2014. Modes of  
415 flagellar assembly in *Chlamydomonas reinhardtii* and *Trypanosoma brucei*. *eLife.* 3:e01479.  
416 doi:10.7554/eLife.01479.
- 417 Ichikawa, M., D. Liu, P.L. Kastiris, K. Basu, T.C. Hsu, S. Yang, and K.H. Bui. 2017.  
418 Subnanometre-resolution structure of the doublet microtubule reveals new classes of  
419 microtubule- associated proteins. *Nature Communications.* 8:1–12.  
420 doi:10.1038/ncomms15035.
- 421 Kar, S., J. Fan, M.J. Smith, M. Goedert, and L.A. Amos. 2003. Repeat motifs of tau bind to the  
422 insides of microtubules in the absence of taxol. *EMBO J.* 22:70–77.  
423 doi:10.1093/emboj/cdg001.
- 424 Kellogg, E.H., S. Howes, S.-C. Ti, E. Ramírez-Aportela, T.M. Kapoor, P. Chacón, and E.  
425 Nogales. 2016. Near-atomic cryo-EM structure of PRC1 bound to the microtubule.  
426 *Proceedings of the National Academy of Sciences.* 113:9430–9439.  
427 doi:10.1073/pnas.1609903113.
- 428 Kikkawa, M., T. Ishikawa, T. Nakata, T. Wakabayashi, and N. Hirokawa. 1994. Direct  
429 visualization of the microtubule lattice seam both in vitro and in vivo. *J. Cell Biol.*  
430 127:1965–1971.
- 431 Kollman, J.M., J.K. Polka, A. Zelter, T.N. Davis, and D.A. Agard. 2010. Microtubule nucleating  
432  $\gamma$ -TuSC assembles structures with 13-fold microtubule-like symmetry. *Nature.* 466:879–882.  
433 doi:10.1038/nature09207.

- 434 Koyfman, A.Y., M.F. Schmid, L. Gheiratmand, C.J. Fu, H.A. Khant, D. Huang, C.Y. He, and W.  
435 Chiu. 2011. Structure of *Trypanosoma brucei* flagellum accounts for its bihelical motion.  
436 *Proc. Natl. Acad. Sci. U.S.A.* 108:11105–11108. doi:10.1073/pnas.1103634108.
- 437 Kremer, J.R., D.N. Mastronarde, and J.R. McIntosh. 1996. Computer visualization of three-  
438 dimensional image data using IMOD. *J. Struct. Biol.* 116:71–76.  
439 doi:10.1006/jsbi.1996.0013.
- 440 Maheshwari, A., J.M. Obbineni, K.H. Bui, K. Shibata, Y.Y. Toyoshima, and T. Ishikawa. 2015.  
441 a- and b-Tubulin Lattice of the Axonemal Microtubule Doublet and Binding Proteins  
442 Revealed by Single Particle Cryo-Electron Microscopy and Tomography. *Structure/Folding  
443 and Design.* 23:1584–1595. doi:10.1016/j.str.2015.06.017.
- 444 Mandelkow, E.M., E. Mandelkow, and R.A. Milligan. 1991. Microtubule dynamics and  
445 microtubule caps: a time-resolved cryo-electron microscopy study. *J. Cell Biol.* 114:977–  
446 991.
- 447 Mandelkow, E.M., R. Schultheiss, R. Rapp, M. Müller, and E. Mandelkow. 1986. On the surface  
448 lattice of microtubules: helix starts, protofilament number, seam, and handedness. *J. Cell  
449 Biol.* 102:1067–1073.
- 450 Marshall, W.F. 2001. Intraflagellar transport balances continuous turnover of outer doublet  
451 microtubules: implications for flagellar length control. *J. Cell Biol.* 155:405–414.  
452 doi:10.1083/jcb.200106141.
- 453 Mastronarde, D.N. 2005. Automated electron microscope tomography using robust prediction of  
454 specimen movements. *J. Struct. Biol.* 152:36–51. doi:10.1016/j.jsb.2005.07.007.
- 455 McIntosh, J.R., M.K. Morpew, P.M. Grissom, S.P. Gilbert, and A. Hoenger. 2009. Lattice  
456 Structure of Cytoplasmic Microtubules in a Cultured Mammalian Cell. *Journal of Molecular  
457 Biology.* 394:177–182. doi:10.1016/j.jmb.2009.09.033.
- 458 Mimori-Kiyosue, Y., N. Shiina, and S. Tsukita. 2000. The dynamic behavior of the APC-binding  
459 protein EB1 on the distal ends of microtubules. *Curr. Biol.* 10:865–868.
- 460 Mitchison, T.J. 1993. Localization of an exchangeable GTP binding site at the plus end of  
461 microtubules. *Science.* 261:1044–1047.
- 462 Moritz, M., M.B. Braunfeld, J.W. Sedat, B. Alberts, and D.A. Agard. 1995. Microtubule  
463 nucleation by gamma-tubulin-containing rings in the centrosome. *Nature.* 378:638–640.  
464 doi:10.1038/378638a0.
- 465 Nakaseko, Y., G. Goshima, J. Morishita, and M. Yanagida. 2001. M phase-specific kinetochore  
466 proteins in fission yeast: microtubule-associating Dis1 and Mtc1 display rapid separation and  
467 segregation during anaphase. *Curr. Biol.* 11:537–549.
- 468 Nicastro, D. 2006. The Molecular Architecture of Axonemes Revealed by Cryoelectron  
469 Tomography. *Science.* 313:944–948. doi:10.1126/science.1128618.

- 470 Nicastro, D., X. Fu, T. Heuser, A. Tso, M.E. Porter, and R.W. Linck. 2011a. Cryo-electron  
471 tomography reveals conserved features of doublet microtubules in flagella. *Proceedings of*  
472 *the National Academy of Sciences*. 108:E845–53. doi:10.1073/pnas.1106178108.
- 473 Nicastro, D., X. Fu, T. Heuser, A. Tso, M.E. Porter, and R.W. Linck. 2011b. Cryo-electron  
474 tomography reveals conserved features of doublet microtubules in flagella. *Proc. Natl. Acad.*  
475 *Sci. U.S.A.* 108:E845–53. doi:10.1073/pnas.1106178108.
- 476 Nogales, E., and R. Zhang. 2016. ScienceDirectVisualizing microtubule structural transitions and  
477 interactions with associated proteins. *Current Opinion in Structural Biology*. 37:90–96.  
478 doi:10.1016/j.sbi.2015.12.009.
- 479 Oakley, C.E., and B.R. Oakley. 1989. Identification of gamma-tubulin, a new member of the  
480 tubulin superfamily encoded by mipA gene of *Aspergillus nidulans*. *Nature*. 338:662–664.  
481 doi:10.1038/338662a0.
- 482 Perez, F., G.S. Diamantopoulos, R. Stalder, and T.E. Kreis. 1999. CLIP-170 highlights growing  
483 microtubule ends in vivo. *Cell*. 96:517–527.
- 484 Portman, N., and K. Gull. 2010. The paraflagellar rod of kinetoplastid parasites: From structure  
485 to components and function. *International Journal for Parasitology*. 40:135–148.  
486 doi:10.1016/j.ijpara.2009.10.005.
- 487 Praveen, K., E.E. Davis, and N. Katsanis. 2015. Unique among ciliopathies: primary ciliary  
488 dyskinesia, a motile cilia disorder. *F1000Prime Rep*. 7. doi:10.12703/P7-36.
- 489 Ringo, D.L. 1967. Flagellar motion and fine structure of the flagellar apparatus in  
490 *Chlamydomonas*. *J. Cell Biol.* 33:543–571.
- 491 Rodríguez Echandía, E.L., R.S. Piezzi, and E.M. Rodríguez. 1968. Dense-core microtubules in  
492 neurons and gliocytes of the toad *Bufo arenarum* Hensel. *Am. J. Anat.* 122:157–166.  
493 doi:10.1002/aja.1001220110.
- 494 Satir, P. 1968. Studies on cilia. 3. Further studies on the cilium tip and a “sliding filament” model  
495 of ciliary motility. *J. Cell Biol.* 39:77–94.
- 496 Scheffler, K., R. Minnes, V. Fraisier, A. Paoletti, and P.T. Tran. 2015. Microtubule minus end  
497 motors kinesin-14 and dynein drive nuclear congression in parallel pathways. *J. Cell Biol.*  
498 209:47–58. doi:10.1083/jcb.201207168.
- 499 Schwartz, C.L., J.M. Heumann, S.C. Dawson, and A. Hoenger. 2012. A Detailed, Hierarchical  
500 Study of *Giardia lamblia*'s Ventral Disc Reveals Novel Microtubule-Associated Protein  
501 Complexes. *PLoS ONE*. 7:e43783. doi:10.1371/journal.pone.0043783.s010.
- 502 Simon, J.R., and E.D. Salmon. 1990. The structure of microtubule ends during the elongation  
503 and shortening phases of dynamic instability examined by negative-stain electron  
504 microscopy. *J. Cell. Sci.* 96 ( Pt 4):571–582.



- 505 Song, Y.H., and E. Mandelkow. 1995. The anatomy of flagellar microtubules: polarity, seam,  
506 junctions, and lattice. *J. Cell Biol.* 128:81–94.
- 507 Soppina, V., J.F. Herbstman, G. Skiniotis, and K.J. Verhey. 2012. Luminal Localization of  $\alpha$ -  
508 tubulin K40 Acetylation by Cryo-EM Analysis of Fab-Labeled Microtubules. *PLoS ONE*.  
509 7:e48204. doi:10.1371/journal.pone.0048204.s006.
- 510 Sui, H., and K.H. Downing. 2006. Molecular architecture of axonemal microtubule doublets  
511 revealed by cryo-electron tomography. *Nature*. 442:475–478. doi:10.1038/nature04816.
- 512 Teng, J., Y. Takei, A. Harada, T. Nakata, J. Chen, and N. Hirokawa. 2001. Synergistic effects of  
513 MAP2 and MAP1B knockout in neuronal migration, dendritic outgrowth, and microtubule  
514 organization. *J. Cell Biol.* 155:65–76. doi:10.1016/S0168-0102(97)00088-6.
- 515 Vaughan, S., M. Shaw, and K. Gull. 2006. A post-assembly structural modification to the lumen  
516 of flagellar microtubule doublets. *Curr. Biol.* 16:R449–50. doi:10.1016/j.cub.2006.05.041.
- 517 Woolley, D.M., and S.N. Nickels. 1985. Microtubule termination patterns in mammalian sperm  
518 flagella. *J. Ultrastruct. Res.* 90:221–234.
- 519 Zanic, M., P.O. Widlund, A.A. Hyman, and J. Howard. 2013. ncb2744. *Nat Cell Biol.* 15:688–  
520 693. doi:10.1038/ncb2744.
- 521

522 **Figure legends:**

523 **Figure 1: Microtubules in the end piece of the human spermatozoon show a repetitive**  
524 **pattern inside their lumen** A) A drawing illustrating positions along the sperm tails where cryo-  
525 electron tomograms were acquired. The 22 tomograms shown were acquired on a total of 13  
526 different cells (1.7 tomograms/cell on average). The highlighted tomograms are shown in the  
527 panels with matching colors. B) A 15 nm thick slice from a cryo-electron tomogram of a sperm  
528 end piece showing singlet microtubules with repetitive diagonal striations with variable tilt  
529 directions (arrows). C) A 3D model of the sperm tip shown in panel B. The microtubules are  
530 shown in turquoise, the membrane in brown. D) A 7 nm thick tomogram slice of one singlet  
531 microtubule from the sperm end piece in B. E) A tomographic slice showing the transition area  
532 from doublet microtubules to singlet microtubules in the sperm tail. F) A 3D model of the sperm  
533 tail shown in panel E. The membrane is shown in brown, the A-tubules in turquoise and the B-  
534 tubules in blue. G) A tomographic slice showing the end of the intralumenal structure (white  
535 arrows) inside the doublet microtubule. H) Central pair microtubules also contain a repetitive  
536 structure inside their lumen (white arrows). Black arrows point at doublet microtubules.

537  
538 **Figure 2: Sub-tomogram averaging reveals the TAILS complex, an interrupted left-handed**  
539 **helix that follows the pattern of the internal microtubule lattice.** A) Cartoon of a typical 13  
540 protofilament microtubule with the 3 start helix and a 12 nm pitch. The microtubule seam is  
541 marked with the red dotted line. B-C) 0.7 nm thick longitudinal slices through the sub-tomogram  
542 average showing the microtubule lattice and the internal electron density (green). D) The 3D  
543 model shows the microtubule lattice (turquoise) and the intralumenal structure (green). Some  
544 protofilaments have been cut away from the model to reveal the internal helical structure. E) A 4  
545 nm thick slice of the sub-tomogram average shows a B-lattice arrangement of the tubulin  
546 heterodimers (purple line). F) A 4 nm thick slice of the sub-tomogram average shows a  
547 disruption in the microtubule B-lattice, revealing the location of the seam (red dotted line). G) A  
548 0.7 nm thick cross-sectional view of the sub-tomogram average. The green arrow points at the  
549 electron density of TAILS. View from flagellum tip, looking towards sperm head. H) Projection  
550 of a 8.4 nm thick cross-sectional view of the sub-tomogram average showing the end of one  
551 TAILS complex segment, the beginning of the next and the gap between them (yellow arrow). I)  
552 3D model of the microtubule (turquoise) and the TAILS complex (green) reveals the gap (yellow  
553 arrow) in the TAILS complex.

554  
555 **Figure 3: Number of microtubules in the singlet region vary but are non-randomly**  
556 **oriented.** A) A cartoon of a spermatozoon showing the location of the cryoETs shown in B-D.  
557 Isosurfaces of sub-tomogram averaged singlet microtubules were aligned into a model volume  
558 according to their original orientations. The gap in the microtubules is used as a marker of the  
559 microtubule seam. Three singlet regions with A) 9 B) 11 and C) 14 microtubules were analyzed  
560 and showed a non-random orientation of the seam.

561  
562 **Figure 4: TAILS binds to the interphase between  $\alpha$  and  $\beta$  tubulin in doublet microtubules.**  
563 **The A-tubule seam is found close to the outer junction, between protofilament A8 and A9.**  
564 A) A longitudinal section through a sub-tomogram average of a dMT shows an 8 nm repeat  
565 structure on the inside of the microtubule walls. B) TAILS is seen as an electron dense dot in one  
566 cross-section of the average (green arrow). C) A minimum projection is done over an 8.4 nm  
567 thick cross-section which shows the expansion of TAILS over 12 protofilaments and the gap in

568 the structure (yellow arrow). D) An isosurface model of the averaged dMT: tubulin in turquoise,  
569 the TAILS complex in green and the B-tubule decorations in yellow. The front microtubule wall  
570 has been cut away for better visualization. E) cross-sectional view of the isosurface from the plus  
571 end. The position of the seam is highlighted by the red cross. F) A cartoon of the dMT with  
572 protofilament numbers, the seam marked with red cross and TAILS extension in green. G) A  
573 cross-sectional view shows the location of the H, I, J and K longitudinal views. H) A 0.7 nm  
574 thick tangential slice of the average, showing the microtubule lattice from the outside. The  
575 resolution is below 4 nm since the subunits of the tubulin heterodimer were resolved. Due to the  
576 position of the MT plus end and the position of the gap (white arrow) in the lattice we infer the  
577 position of  $\alpha$  (purple arrow) and  $\beta$  (turquoise arrow). I) A 4 nm slice of the average contains  
578 whole protofilaments and reveals the position of the A-tubule seam (red dotted line). The slope  
579 of the B-lattice is visualized on both sides of the seam with the purple lines. Because of a  
580 distance between the tubulin heterodimers we can infer the position of  $\alpha$  and  $\beta$  tubulin. J) A 4 nm  
581 thick slice of the dMT sub-tomogram average, seen from the inner junction, shows a perfect B-  
582 lattice arrangement over protofilaments A1, A2, and A3. K) The inside of the microtubule  
583 average with the TAILS complex marked in green. TAILS binds between the  $\alpha$  and  $\beta$  subunits.  
584 The decoration within the B tubule is marked in yellow. L) This view shows that TAILS binds to  
585 the interface between the  $\alpha$  and  $\beta$  subunit.

586

587 **Figure 5: A schematic representation of two different models of the molecular structure of**  
588 **TAILS.** A 13-protofilaments microtubule from the sperm tail tip is shown as opened up and  
589 unfolded into a sheet, viewed from the luminal side. The TAILS complex (green) is placed at the  
590 position along the y-axis as found in dMTs, as we do not know the exact location in singlet  
591 microtubules. The  $\alpha$  and  $\beta$  tubulin subunits are shown in blue and purple respectively. A) TAILS  
592 is drawn as monomeric C-shaped segments that bind to each protofilament at the  
593 intraheterodimer interface, leaving a gap over the seam. B) TAILS is drawn as a series of C-  
594 shaped multimeric segments, each formed by 11 subunits.  
595

596 **Supplementary material:**

597 **Supplementary Figure 1: Cryo-EM of the end pieces of four intact human spermatozoa**

598 **derived from three different donors.** A) A cryo-electron micrograph of one sperm tail tip  
599 showing repetitive decoration of microtubules (zoomed image). B-D) In all sperm tips the  
600 repetitive pattern inside the microtubules in the singlet region is clearly visible. The arrows point  
601 to some of the more apparent places, but the helical pattern is present through most, if not all,  
602 visible areas.

603

604 **Supplementary Figure 2: A TAILS-like complex is also present in the terminal parts of the**

605 **central pair microtubules, around 7.5 micrometers from the sperm tip.** A) Slice from a cryo-  
606 electron tomogram showing the distal ends of the central pair microtubules (black arrows). B-C)  
607 Zoomed-in images of the central pair microtubules show the striations resembling those typical  
608 of the TAILS complex.

609

610 **Supplementary Figure 3: The location of the microtubule seam.** A) A top-down view of the  
611 3D model of the microtubule sub-tomogram average, including the TAILS helix. Protofilament  
612 numbers have been assigned based on the location of the seam in the dMT A-tubule as in Figure  
613 4F and the numbers correlate to the images in B and C. B) Slices of the sub-tomogram average  
614 oriented such that two neighboring protofilaments are visualized. The red cross is the location of  
615 the red ball in C). The purple line shows the slope between neighboring tubulin subunits and fits  
616 all protofilament pairs except for pair 7-8 where no tubulin subunits could be identified, and pair  
617 8-9 where the slope between protofilaments are different (green line) showing that the seam is  
618 here. C) A longitudinal view of the microtubule 3D model and the protofilaments.

619

620 **Supplementary movies:**

621 **Movie 1: The microtubule singlet region of the intact human spermatozoon.** All  
622 microtubules have a complete decoration of the TAILS complex. Each frame is a 0.7 nm thick  
623 slice from a cryo-electron tomogram. 7 frames/s. Scale bar 100 nm.

624

625 **Movie 2: Cross-sectional view of the microtubule sub-tomogram average and the electron**  
626 **densities that is the TAILS complex that rotates around the lumen.** 6 frames/s. Scale bar 10  
627 nm.

628

629 **Movie 3: Longitudinal view of the microtubule sub-tomogram average containing the**  
630 **TAILS complex.** 6 frames/s. Scale bar 10 nm. 3D model of the sub-tomogram average showing  
631 the microtubule lattice in turquoise and the TAILS complex in green. 6 frames/s.

632

633 **Movie 4: The TAILS complex inside the doublet microtubule.** Scale bar 10 nm.

634

635

636

637

638

**Table 1: Number of electron tomograms acquired, cells imaged and sub-tomograms used for averaging.**

|                                             |      |
|---------------------------------------------|------|
| Number of cryo-ETs                          | 55   |
| Number of cells imaged                      | 33   |
| Number of cryo-ETs used in sub-ET average:  |      |
| - singlet MTs                               | 3    |
| - doublet MTs                               | 1    |
| Number of particles used in sub-ET average: |      |
| - singlet MTs                               | 1940 |
| - doublet MTs                               | 478  |



Figure 1

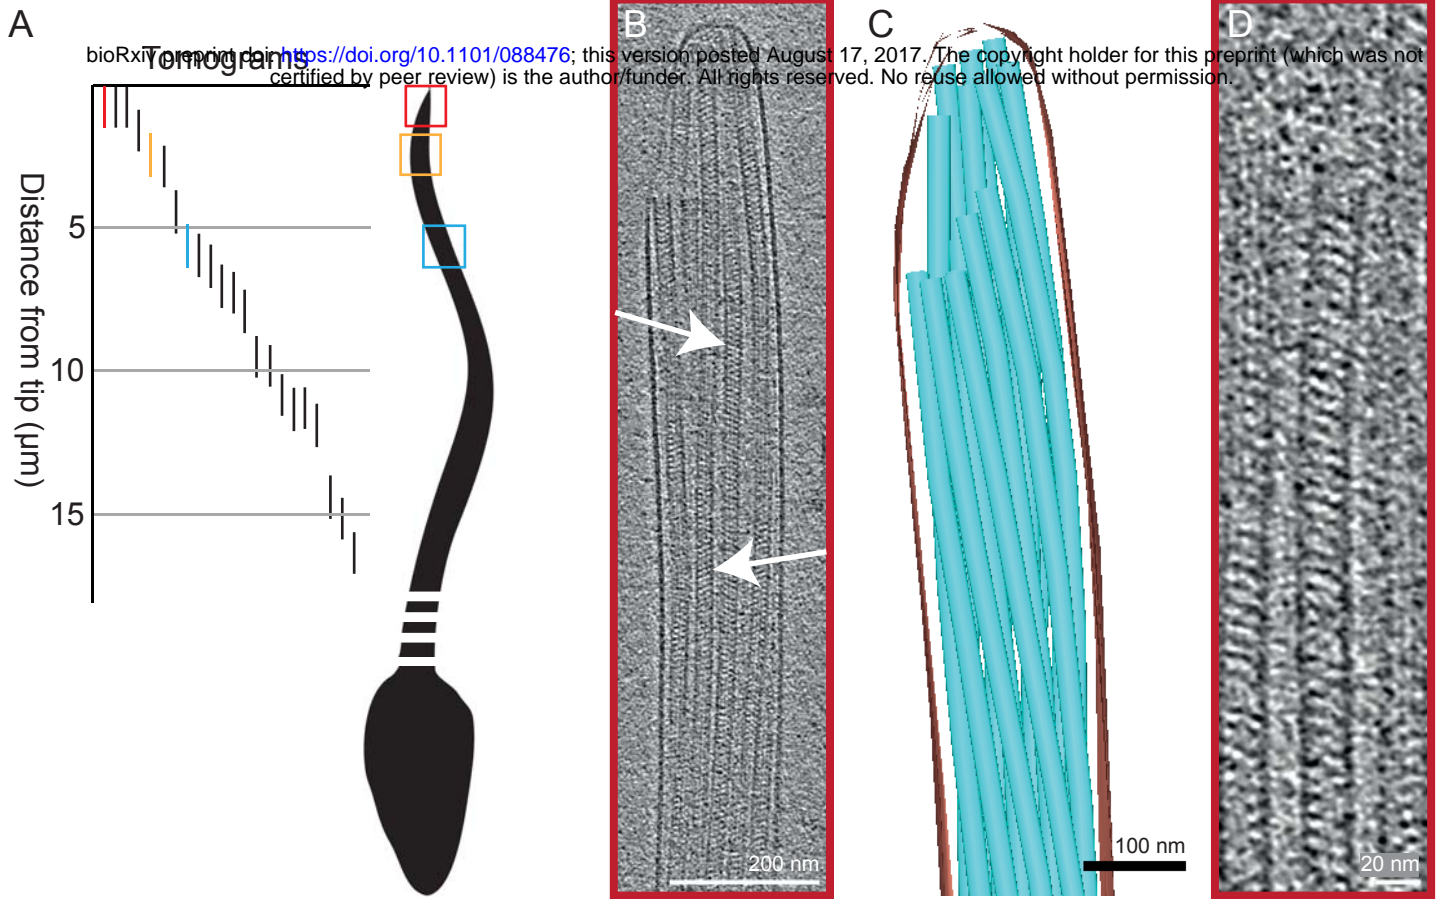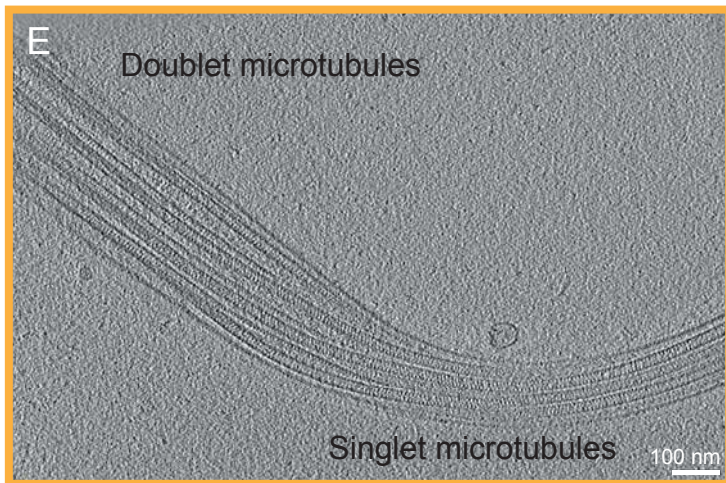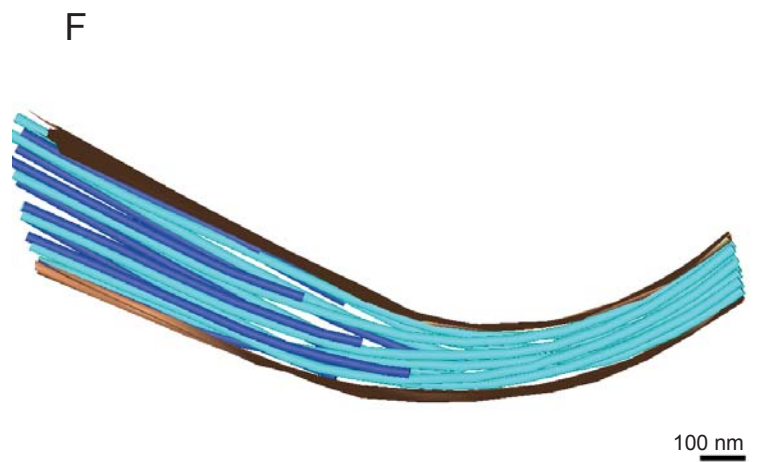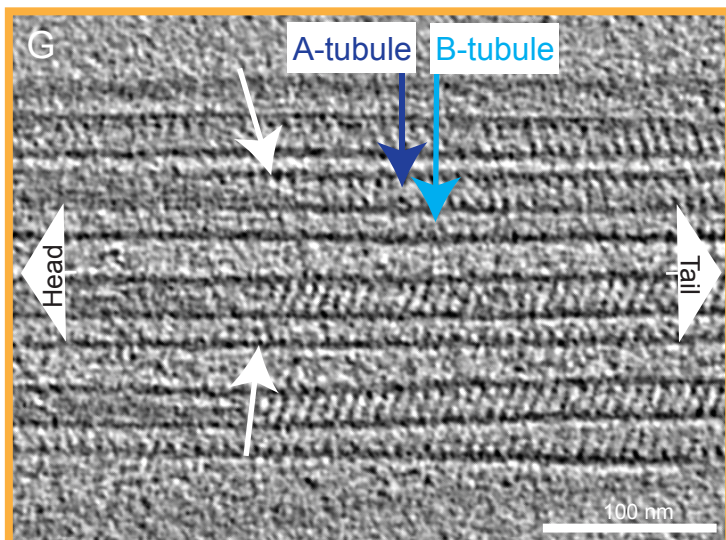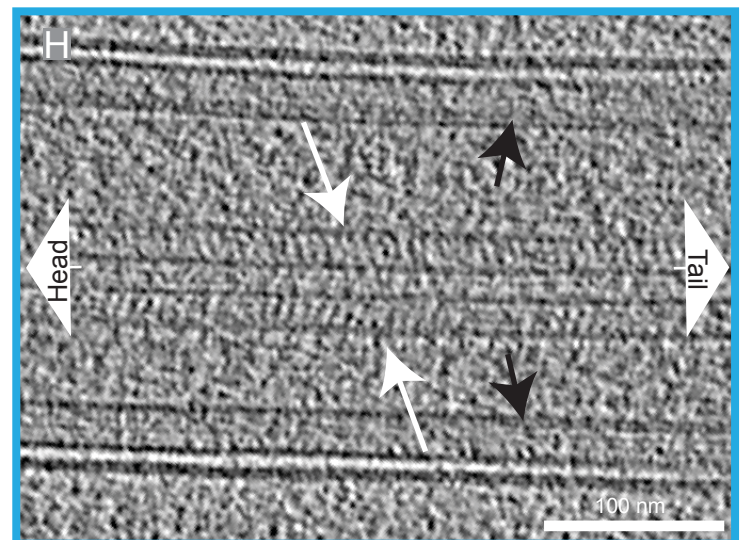



## Figure 2

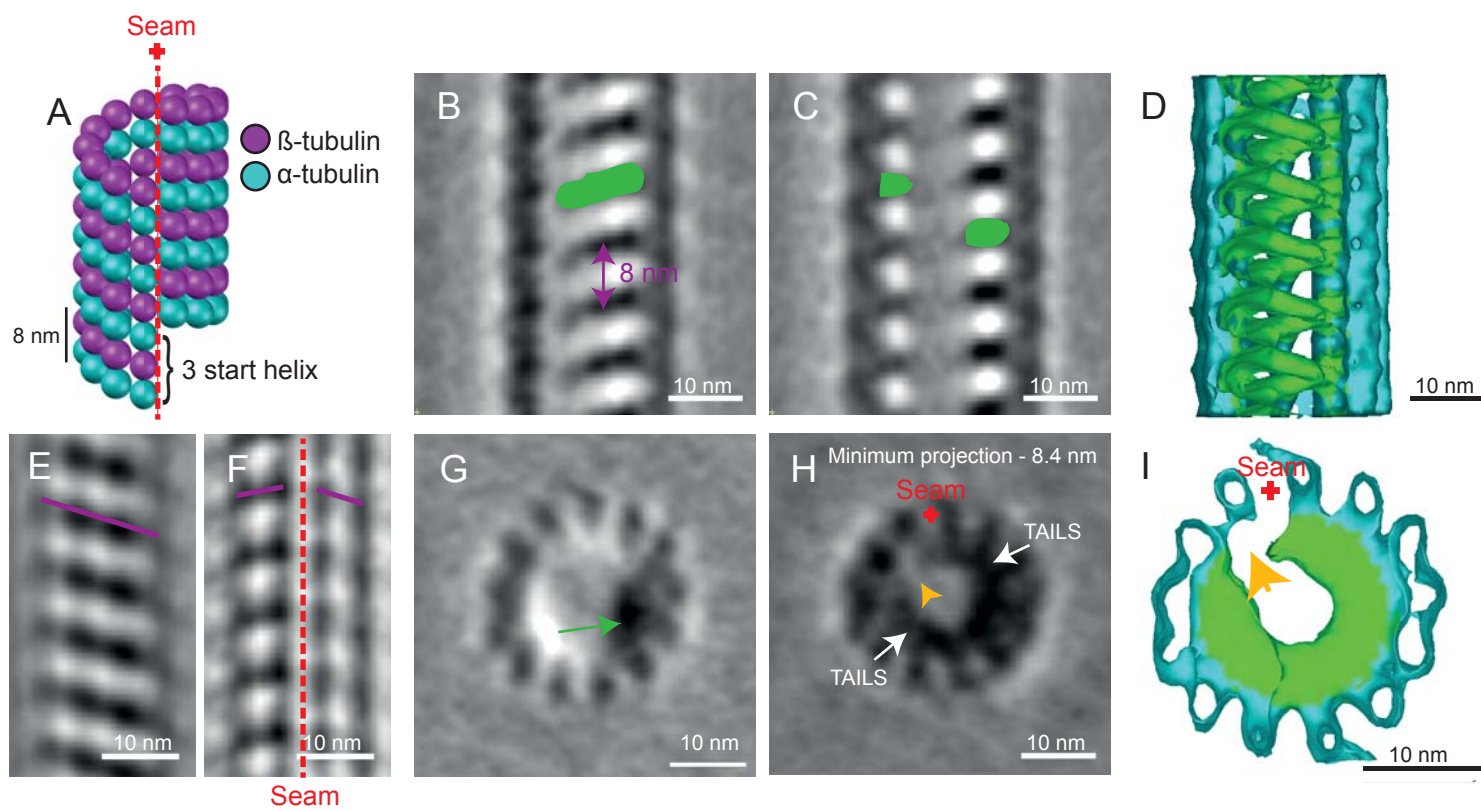

# Figure 3

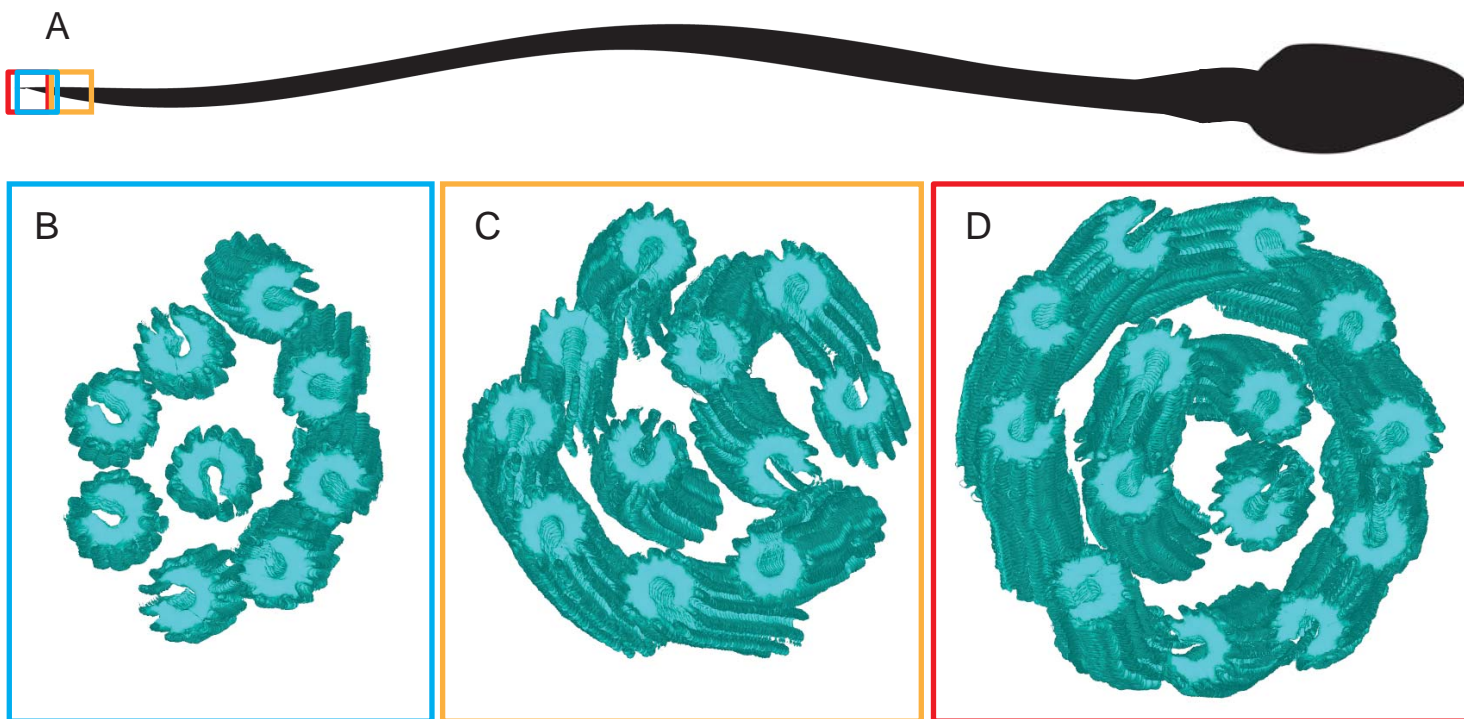

Figure 4

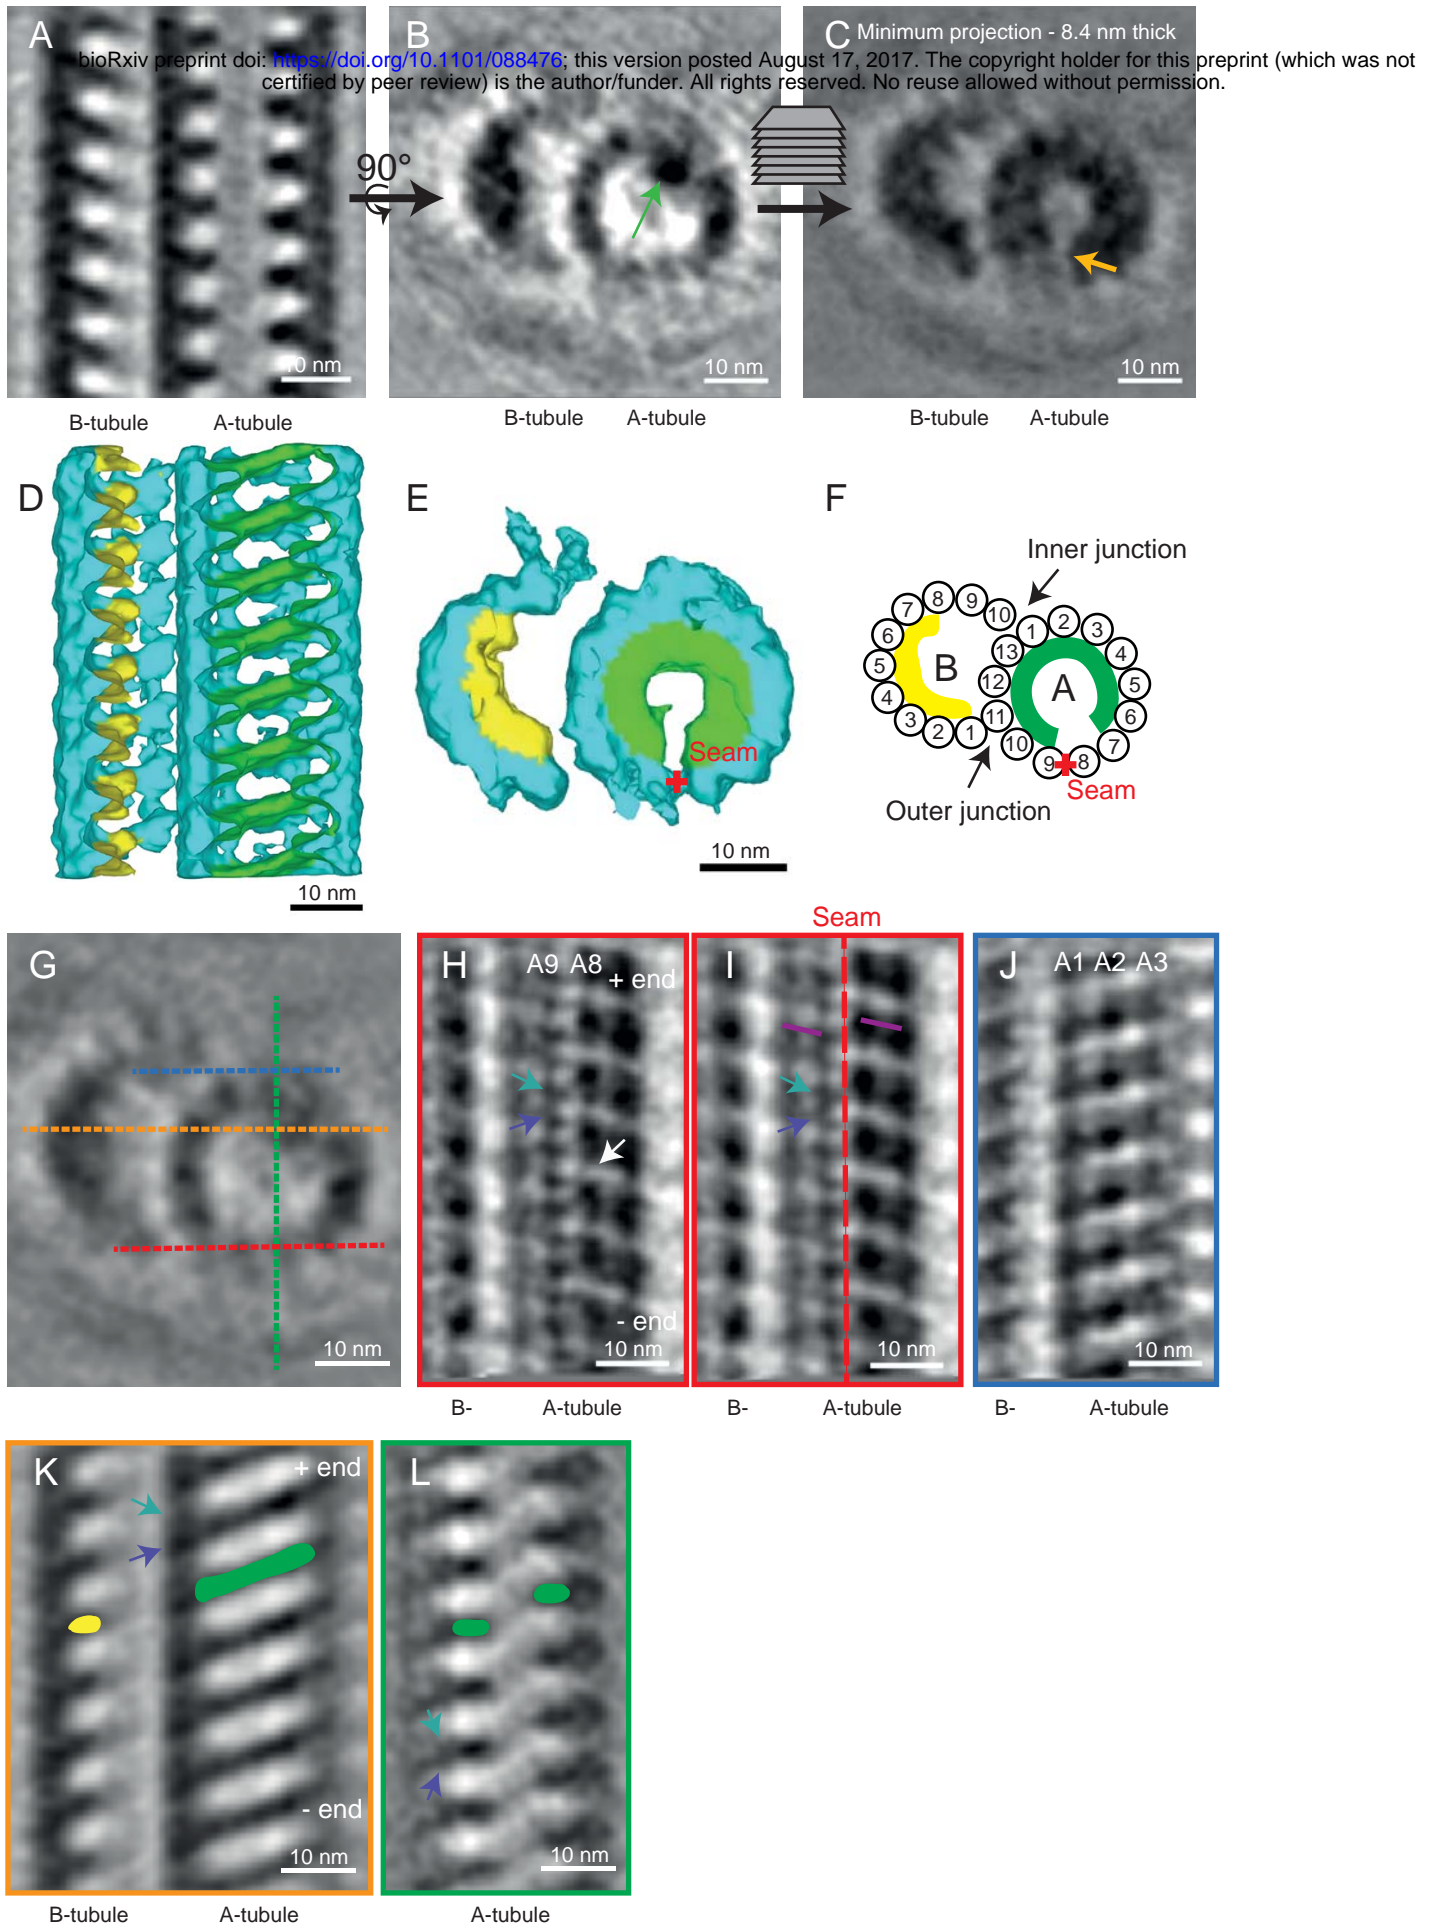

Figure 5

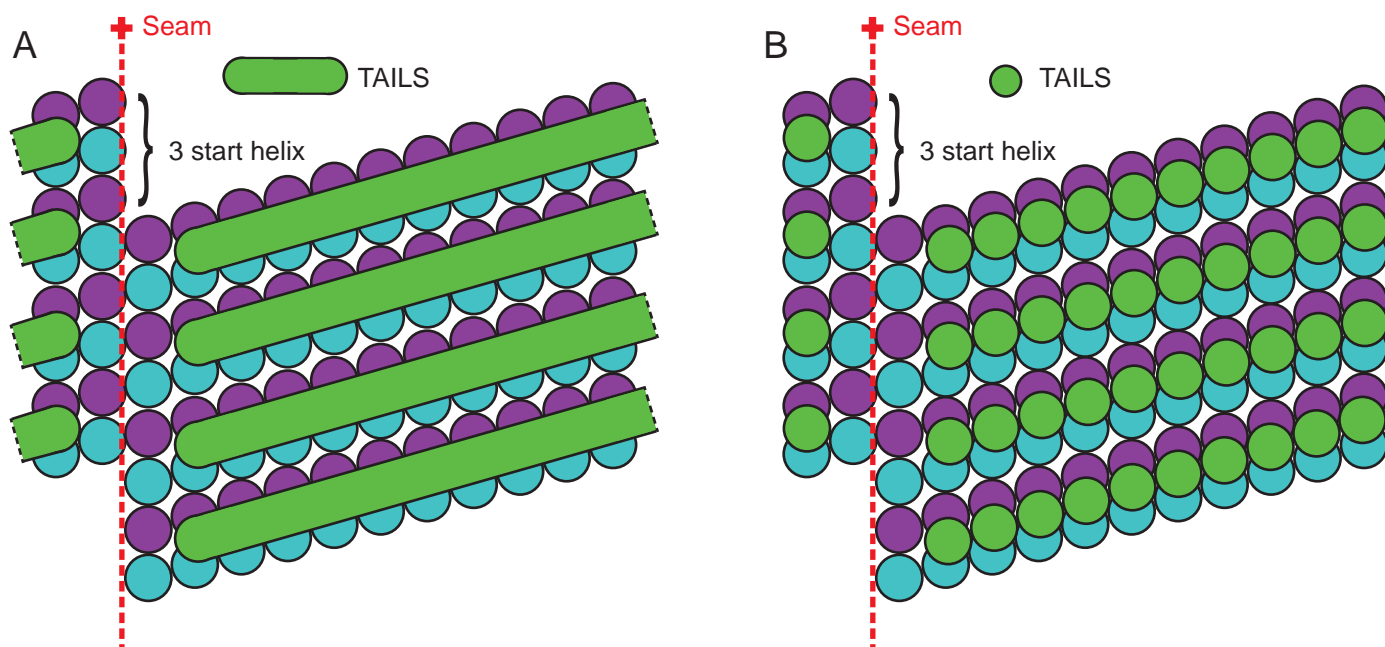



## Supplementary Figure 1

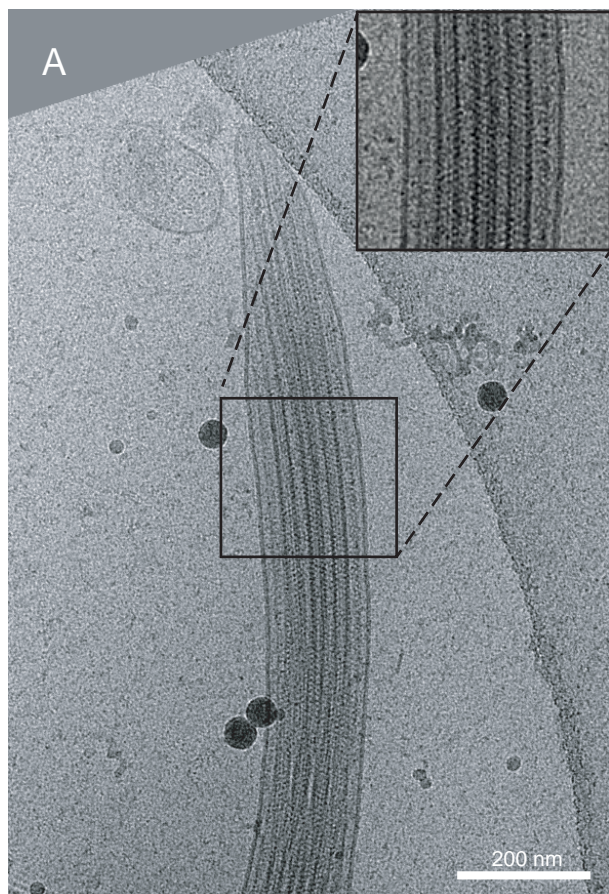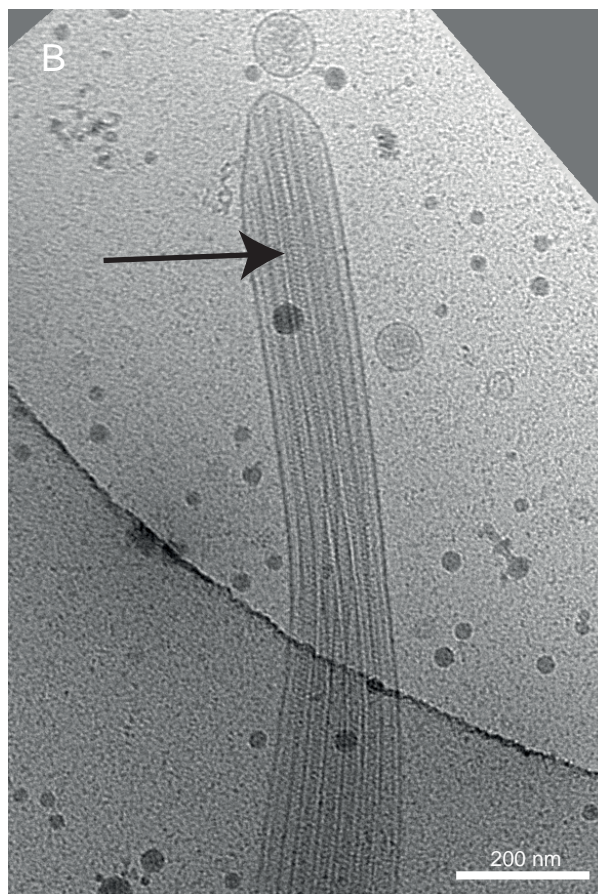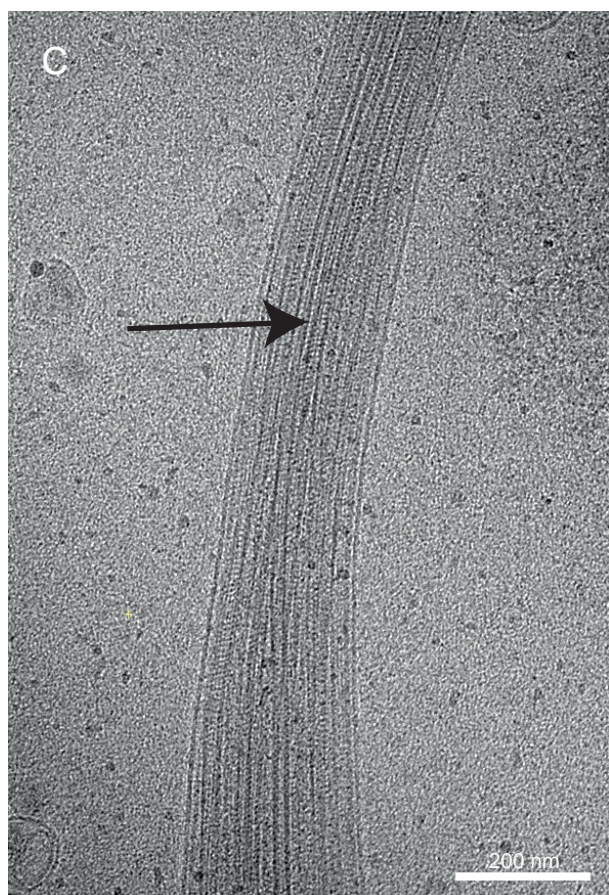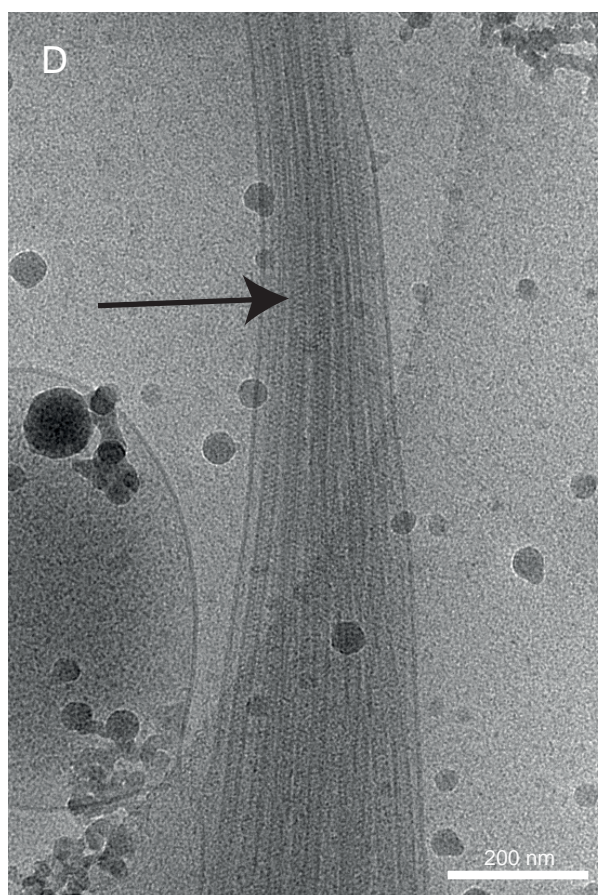



## Supplementary Figure 2

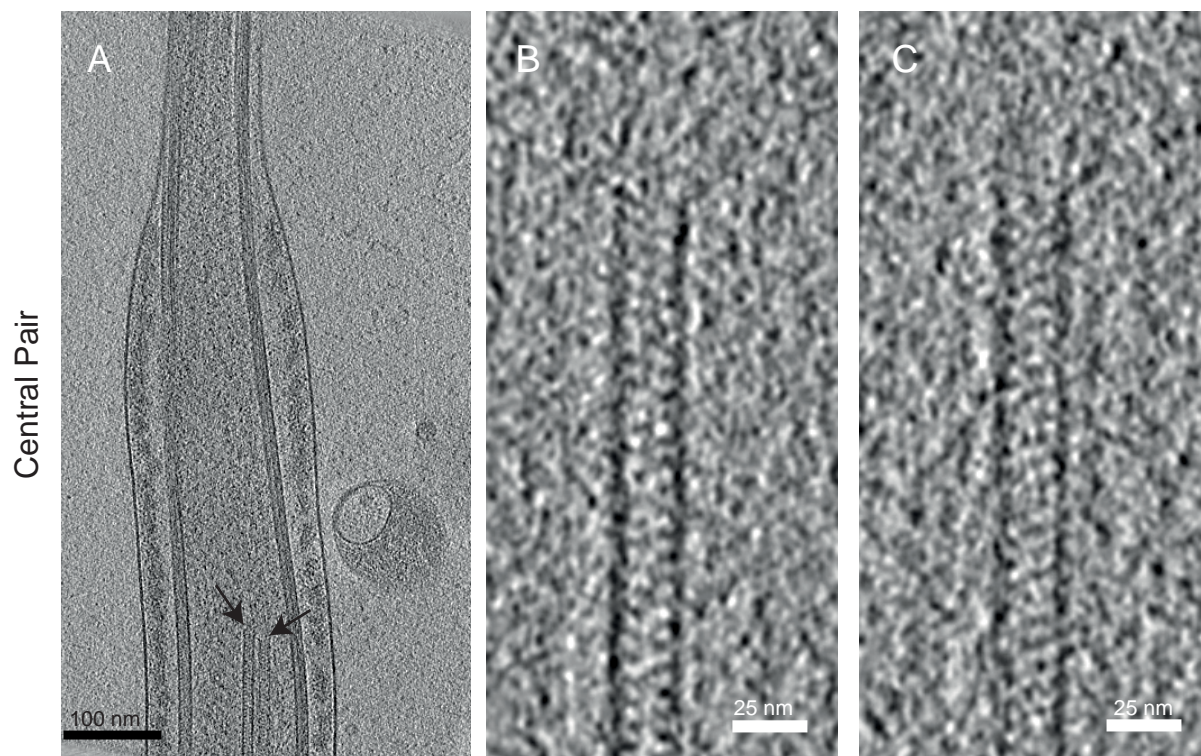



# Supplementary Figure 3

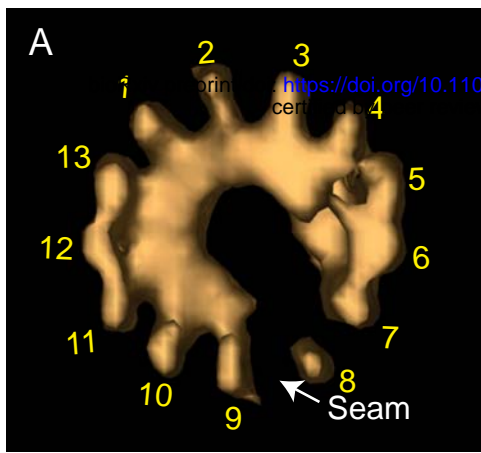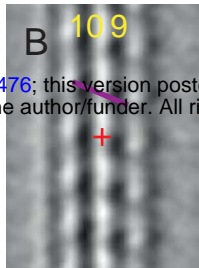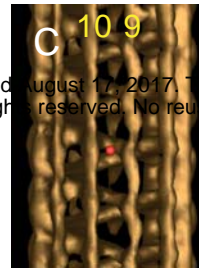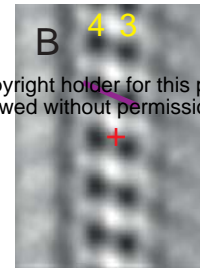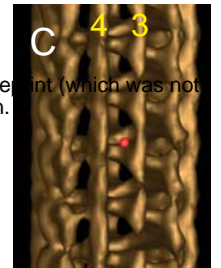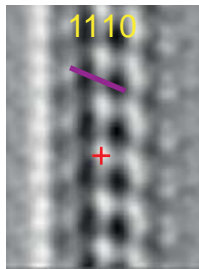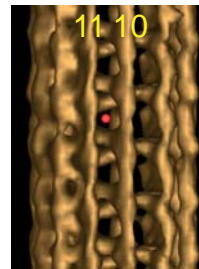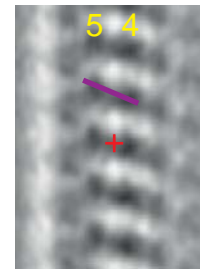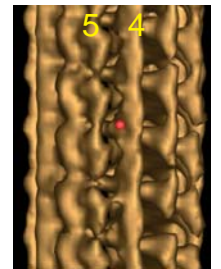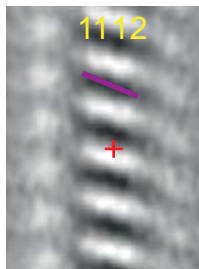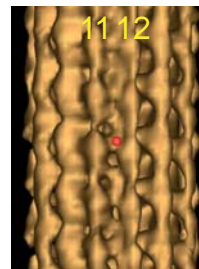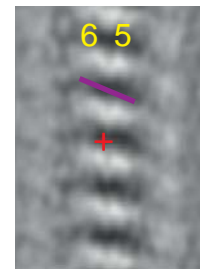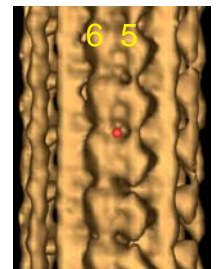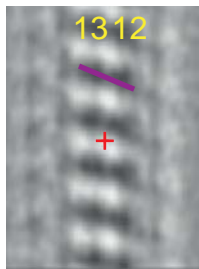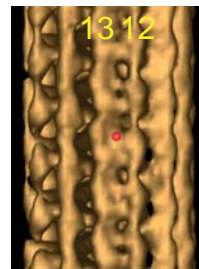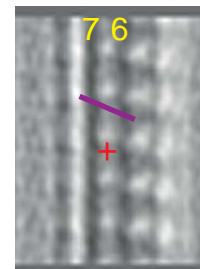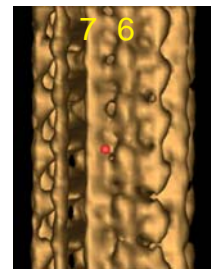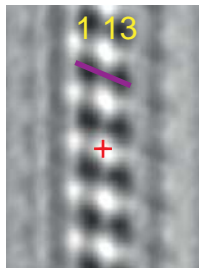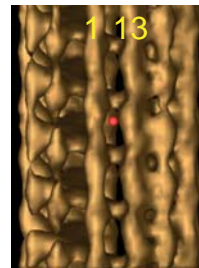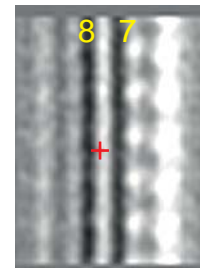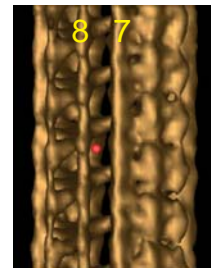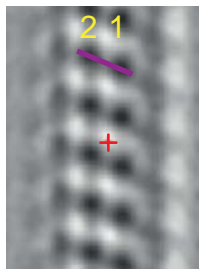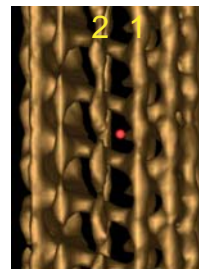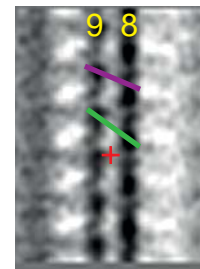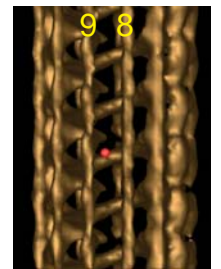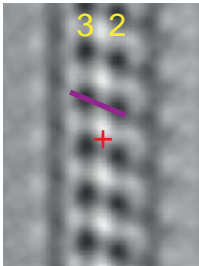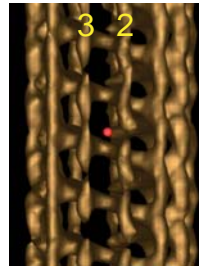

Source: http://www.biorxiv.org/content/10.1101/088476v2.full.pdf
